# Supplementary material
Source: PubMed Central journal article supplement (PMC3023512)
Supplement: supp_M110.188482_jbc.M110.188482-1.pdf [file supp_M110.188482_jbc.M110.188482-1.pdf]

## Supplemental data

TABLE 1

### Oligonucleotides

| RT-PCR                                                |                                                                                                                                                                                                 |
|-------------------------------------------------------|-------------------------------------------------------------------------------------------------------------------------------------------------------------------------------------------------|
| <i>p200</i> (N-terminal)                              | 5'- CCTGGACGTCGGGCAACAGCTG                                                                                                                                                                      |
|                                                       | 5'- CTTCAGGGTCTGCTCGTATTCTCGG                                                                                                                                                                   |
| <i>p200/p110</i> (C-terminal)                         | 5'-CCCAGGGTTCTGTCTCCGACC                                                                                                                                                                        |
|                                                       | 5'-GTCACTGACAGAGCTGTGTCGCC                                                                                                                                                                      |
| Cloning                                               |                                                                                                                                                                                                 |
| CACC upstream of <i>Lepr-b</i> cDNA                   | 5'-CACCATGGTGTGTCAGAAATTCTATGTGGTTTTGTACTACTGG<br>5'-TTACTTGTACAGCTCGTCCATGCCGAGAGTGATCCCG                                                                                                      |
| <i>FTO</i> minimal promoters                          | 5'-GTCTcccgggGGATGATTTTCTGGTCCCCATTCTC(SmaI)<br>5'-AGCCctcgagCTTCAAGCTCTTCAAGAAGCCTCAG (XhoI)<br>5'-TCCGcccgggCGCGAGCAAACAGGCTAGAGTCCAA(XhoI)<br>5'-TGCAGgtaccGAATGAAGATACTCTAAAGGGCAGAG (KpnI) |
| <i>RPGRIP1L</i> minimal promoter                      | 5'-CGTGctcgagGGCTGGCCGAGAGGAGC(XhoI)<br>5'-GAGTgctagcCCAGAAACAATCCTAATGTC (NheI)                                                                                                                |
| Enhancer upstream of <i>FTO</i> minimal promoters     | 5'-AGATacgcgtGCAAAATTTACACACCAAGATGGTCATG (MluI)<br>5'-GGCTggtaccCTGTCTCTTCTACCAGG (KpnI)                                                                                                       |
| Enhancer upstream of <i>RPGRIP1L</i> minimal promoter | 5'-AGATggtaccGCAAAATTTACACACCAAGATGGTCATG (KpnI)<br>5'-GGCTacgcgtCTGTCTCTTCTACCAGG (MluI)                                                                                                       |
| EMSA                                                  |                                                                                                                                                                                                 |
| CUX1 binding site containing the A allele             | 5'-AGTTGCCACTGTGGCAATAAATATCTGAGCCTGTGGT                                                                                                                                                        |
| CUX1 binding site containing the C allele             | 5'-AGTTGCCACTGTGGCAATCAATATCTGAGCCTGTGGT                                                                                                                                                        |
| Mutated CUX1 binding site                             | 5'-AGTTGCCACTGTGGCAGGGAATATCTGAGCCTGTGGT                                                                                                                                                        |
| Mouse Cux1 binding site                               | 5'-GTAGAGTAAATAGTTTACAAAGTGAATAAATATGAGT                                                                                                                                                        |
| Mouse Cux1 binding site with the human C allele       | 5'-GTAGAGTAAATAGTTTACAAAGTGAATCAATATGAGT                                                                                                                                                        |
| siRNA                                                 |                                                                                                                                                                                                 |
| <i>Fto</i> -specific                                  | 5'-AUCGGAACCAGUAUUCUACUGUGCC<br>5'-UCAUCCAGCAUGAAAUAGCAGUCUC<br>5'-AUUUCAACGAGACGUCGCCAUCGUC                                                                                                    |
| Scrambled control                                     | 5'-GCUCUCCGAAGCGUAUAGUCAAUUCU<br>5'-GGAAAGCCCUAACCUACACUGUUUA<br>5'-GCUGACGAUCCACCCGCAUUUAGUA                                                                                                   |
| <i>Rpgrip1l</i> -specific                             | 5'-AUCGGAACCAGUAUUCUACUGUGCC<br>5'-AAACAGGUCAGCAAGGUCAACAUGG<br>5'-AUAGUAGACCCACUGUCCACUCUGG                                                                                                    |
| Scrambled control                                     | 5'-GUACGACUUGACUACCGCGAUUAUCU<br>5'-GCCGAGAGAUUAGGUCAUCAGACAA<br>5'-GCUCGCGCACCUUAUCAUAGAGUCA                                                                                                   |
